# Supplementary material
Source: Frontiers journal article supplement (https://www.frontiersin.org/articles/328060)
Supplement: Image_8.pdf [file Image_8.pdf]

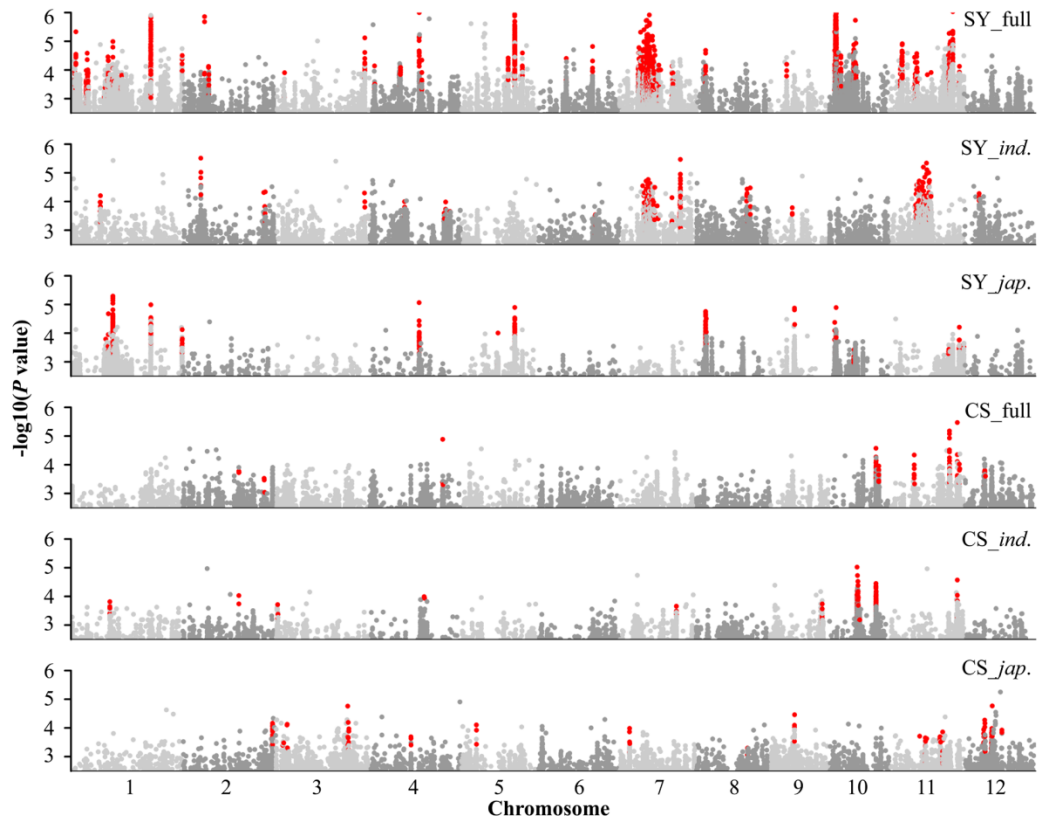

**SUPPLEMENTARY FIGURE 8. Manhattan plots of GWAS for PN in full (full), *indica* (*ind.*) and *japonica* (*jap.*) populations at SY and CS. Red dots indicate  $-\log_{10}(P \text{ value})$  of SNPs in GWAS when higher than the highest  $-\log_{10}(P \text{ value})$  in 1000 permutations.**
